# Supplementary material
Source: PubMed Central journal article supplement (PMC8049960)

**Figure S1. Device design**

(a) Two identical layers containing 3 lanes divided by 2 rails are bonded together. (b) The three lanes correspond to different compartments of a blood vessel – extravascular space, vessel wall, and intravascular space. (c,d) In the assembled device, the intravascular and extravascular channels have cross sectional dimensions of 0.5 mm (width) X 1 mm (height). The microchannel representing the vessel wall is 1 mm (width) X 1 mm (height). The three channels are separated by 250  $\mu\text{m}$ -tall rails.

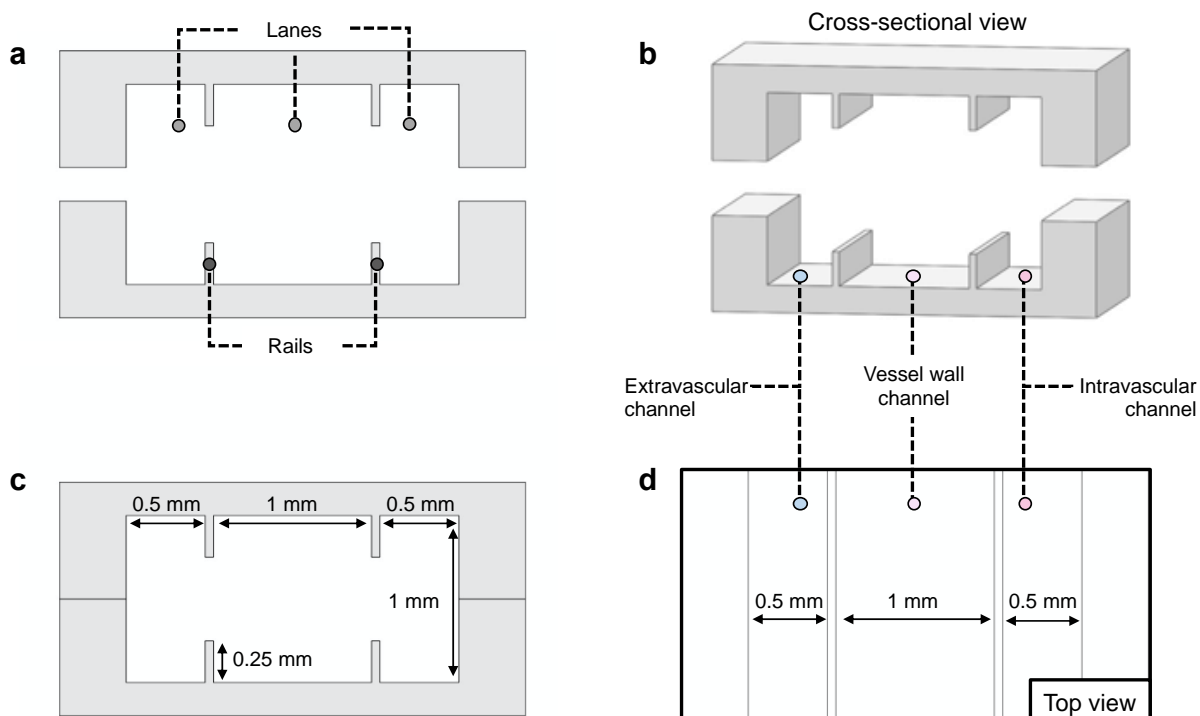

**Figure S2. Experimental set up for flow control in the blood vessel-on-a-chip**

Blood is pushed through the intravascular channel (I) using a syringe pump at a constant flow rate of 250  $\mu\text{L}/\text{min}$ . HBSS buffer is pulled from a reservoir through the extravascular channel (E) at 1.25  $\mu\text{L}/\text{min}$ .

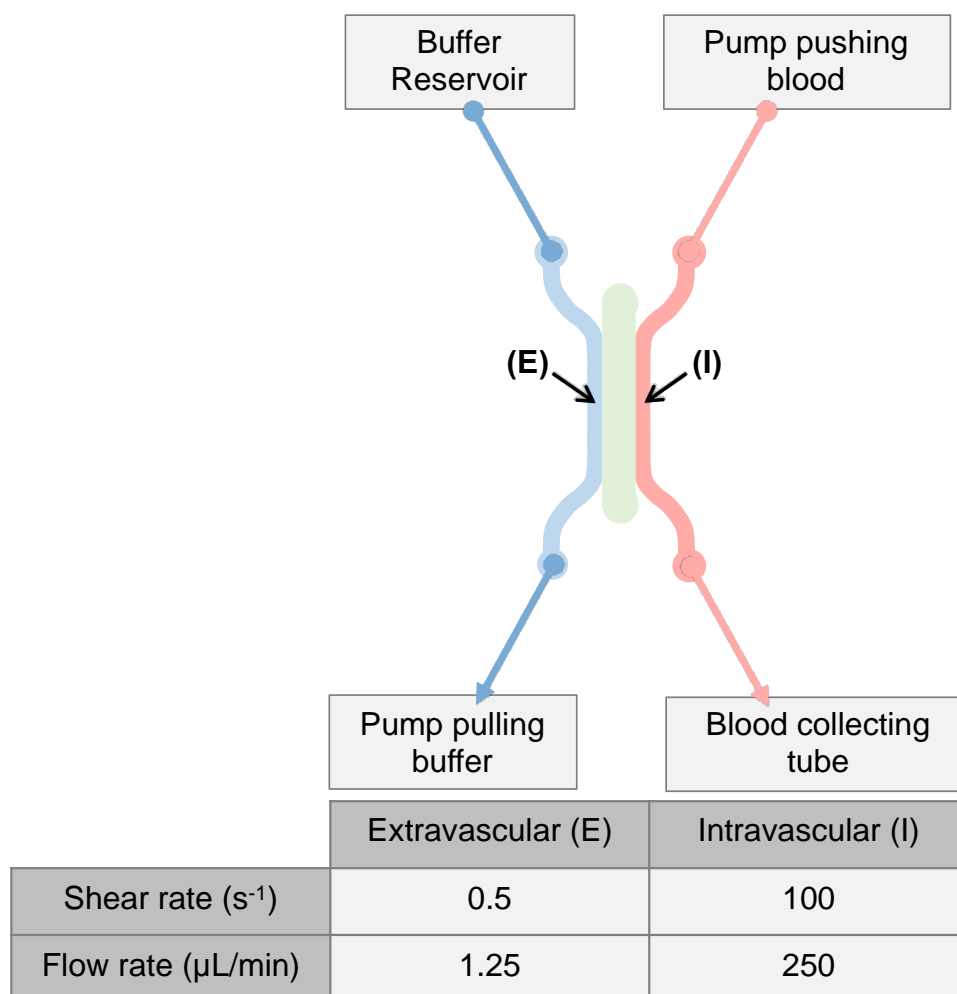

Supplement: NIHMS1644873-supplement-1.pdf [file NIHMS1644873-supplement-1.pdf]
